# Supplementary material for: Galvanic replacement of liquid metal Galinstan with copper for the formation of photocatalytically active nanomaterials
Source: Royal Society of Chemistry journal article supplement (doi:10.1039/d0nj02652b), 2020-01-01
Supplement: d0nj02652b1.pdf [file d0nj02652b1.pdf]

## Supplementary Information

### Galvanic Replacement of Liquid Metal Galinstan with Copper for the Formation of Photocatalytically Active Nanomaterials

*Olawale Oloye,<sup>1,2</sup> Joseph F. S. Fernando<sup>1,2</sup>, Eric R. Waclawik<sup>1,2</sup>, Dimitri Golberg<sup>1,2</sup> and Anthony P. O'Mullane<sup>1,2\*</sup>*

<sup>1</sup> School of Chemistry and Physics, Queensland University of Technology (QUT), Brisbane, QLD 4001, Australia.

<sup>2</sup> Centre for Materials Science, Queensland University of Technology (QUT), Brisbane, QLD 4001, Australia.

Corresponding author. Email: [anthony.omullane@qut.edu.au](mailto:anthony.omullane@qut.edu.au)

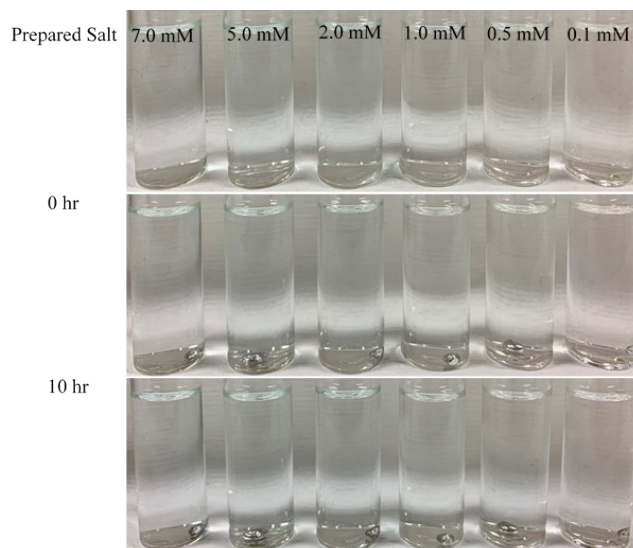

**Figure S1.** Digital images of a liquid metal galinstan droplet in different concentrations (low) of neutral copper salt ( $\text{CuSO}_4 \cdot 5\text{H}_2\text{O}$ ) at 0 hour, and 10 hours.

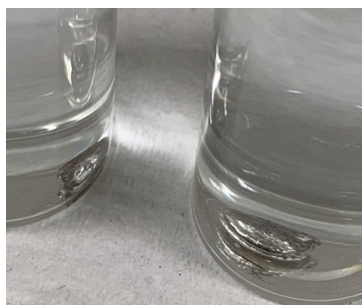

**Figure S2.** Digital images of a liquid metal galinstan droplet in 7.0 mM copper salt ( $\text{CuSO}_4 \cdot 5\text{H}_2\text{O}$ ) after 24 hours of galvanic replacement reaction at room temperature, showing the formation of brownish copper pigment at the surface of bulk galinstan drop.

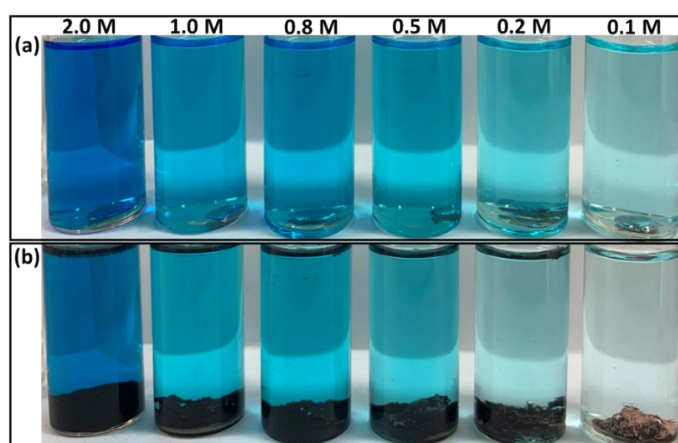

**Figure S3.** Digital images of a liquid metal galinstan droplet in different concentrations of neutral copper salt ( $\text{CuSO}_4 \cdot 5\text{H}_2\text{O}$ ) at (a) 0 hour and (b) 24 hours.

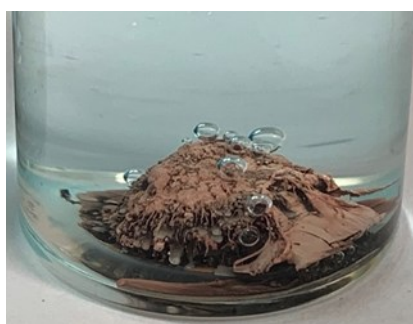

**Figure S4.** Digital images of a liquid metal galinstan droplet in 0.1 M copper salt ( $\text{CuSO}_4 \cdot 5\text{H}_2\text{O}$ ) after 24 hours of galvanic replacement reaction at room temperature.

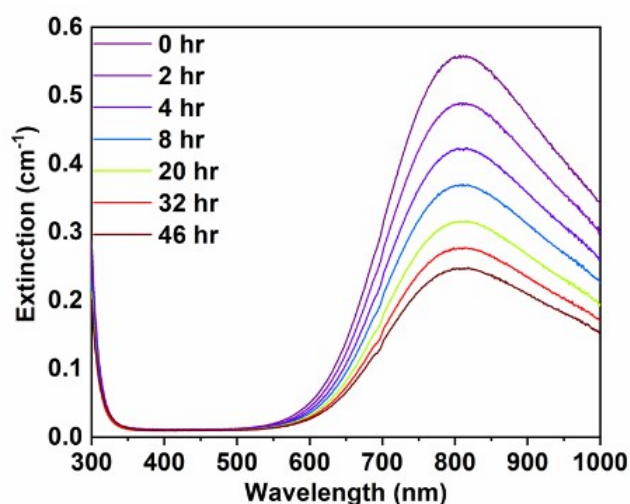

**Figure S5.** Reduction in the intensity of absorption of 0.1 M CuSO<sub>4</sub> solution when exposed to liquid metal Galinstan (note solution was diluted with water prior to measuring the UV-vis spectra to ensure good quality spectra with an intensity < 1 a.u.).

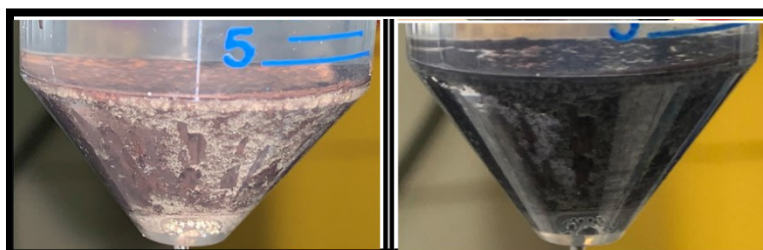

**Figure S6.** Digital images of the reaction vial after galinstan droplet was reacted with 1 M CuSO<sub>4</sub> after 72 hours (**a**) acidified solution (pH 3.74) and (**b**) CuSO<sub>4</sub> in DI water.

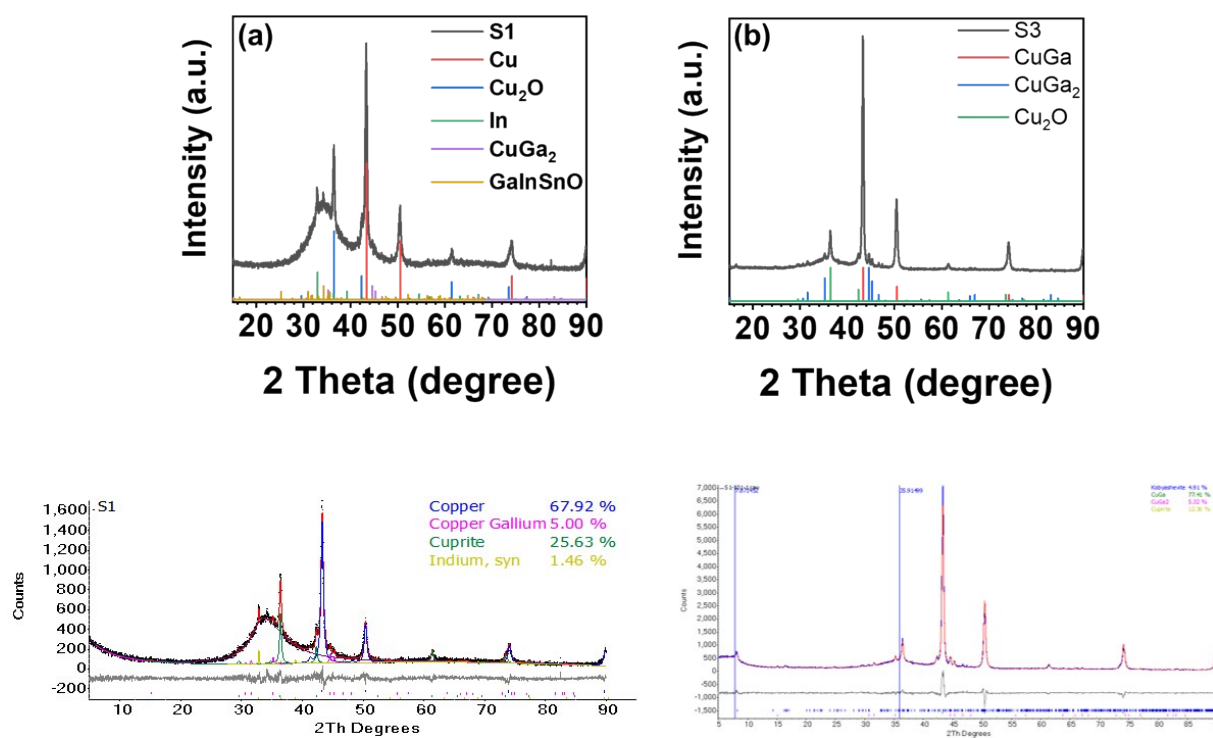

**Figure S7.** XRD pattern of (a) sample S1 and (b) sample S3 where Rietveld refinement of the patterns are also shown.

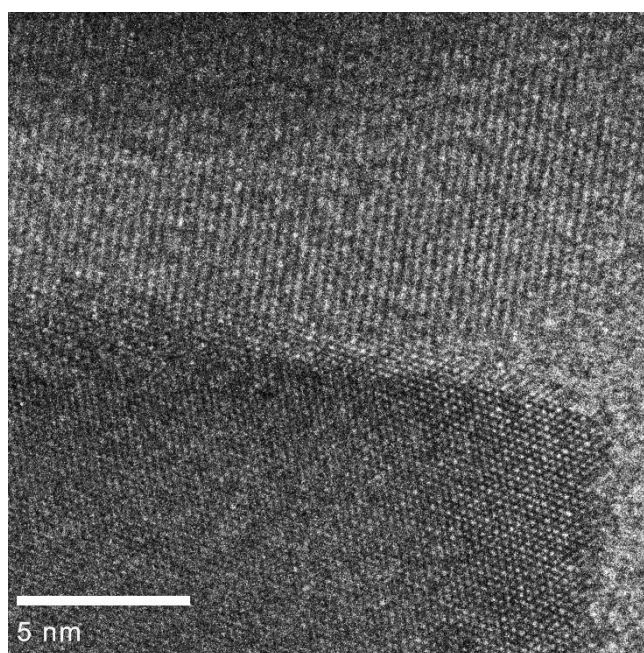

**Figure S8.** HRTEM image of sample S1.

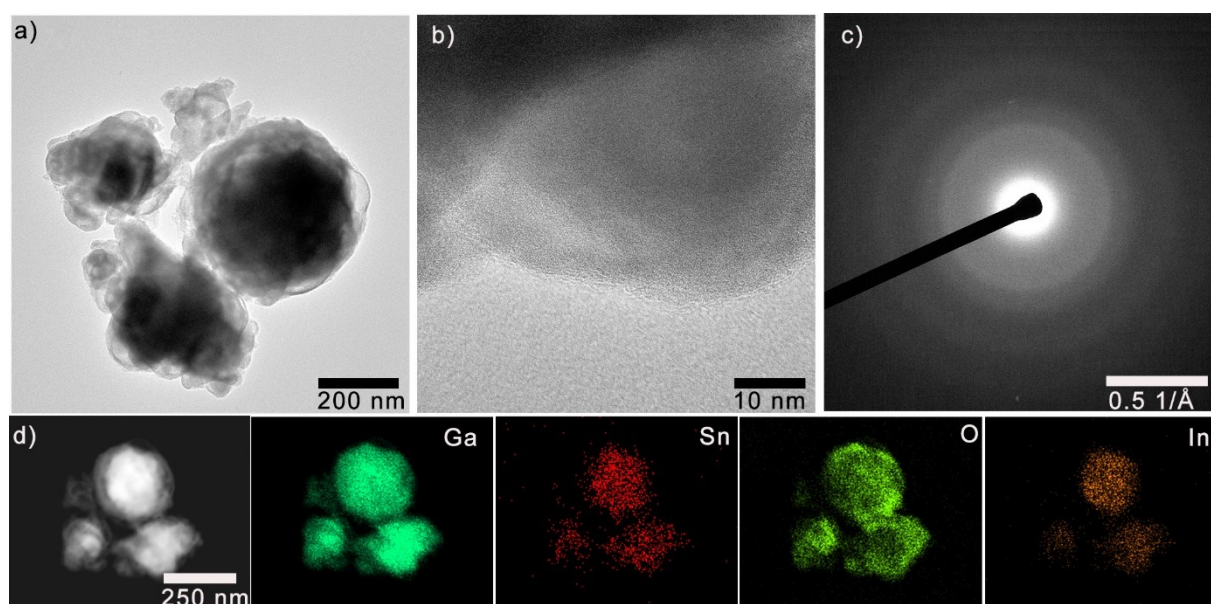

**Figure S9.** Low magnification TEM image of GaInSn sonicated in acidified 5 mM  $\text{CuSO}_4$ , (b) high resolution TEM image, (c) SAED pattern and (d) STEM image and corresponding EDX maps.

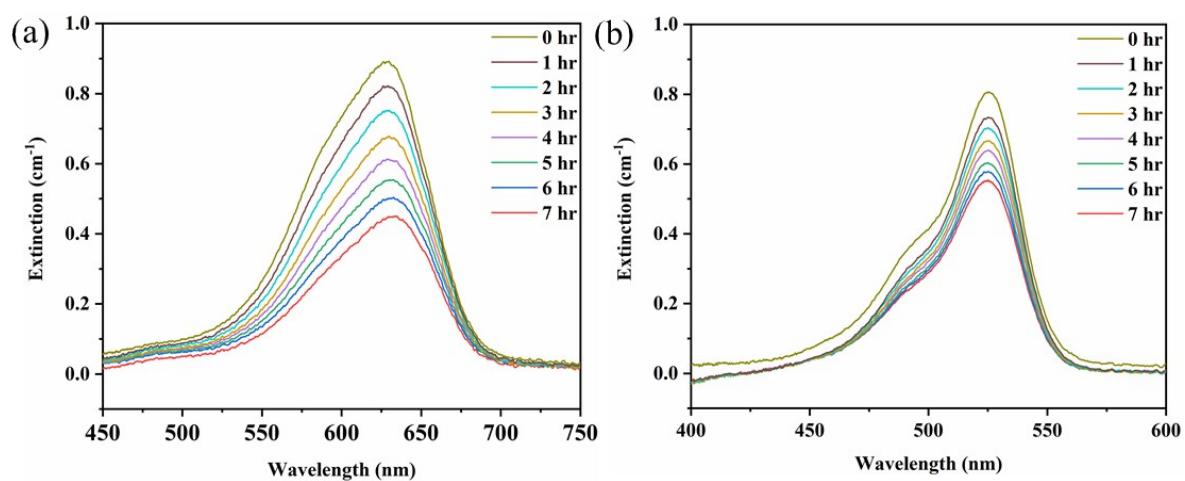

**Figure S10.** (a) S1 (1.3mg) photocatalytic degradation curve of RhB (b) S1 (1.1 mg) photocatalytic degradation curve of TB

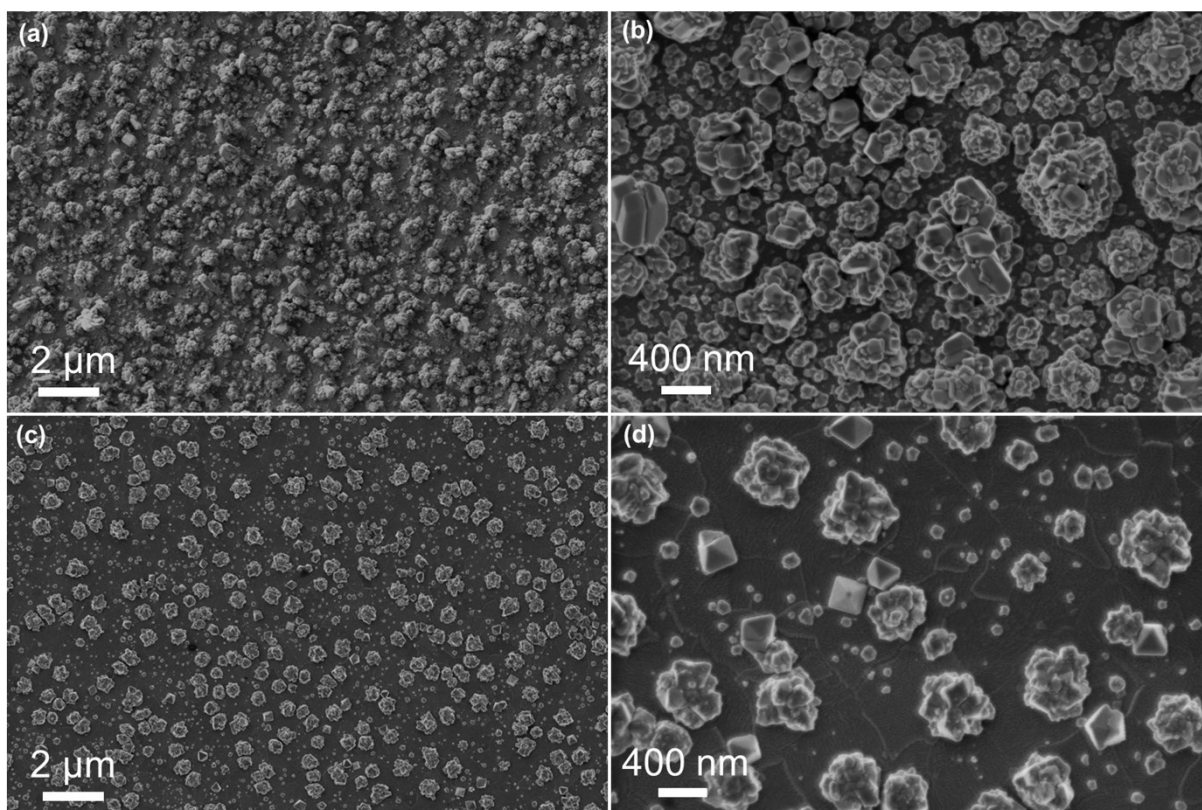

**Figure S11.** (a, b) SEM images of sample S4 (c, d) SEM images of sample S5.

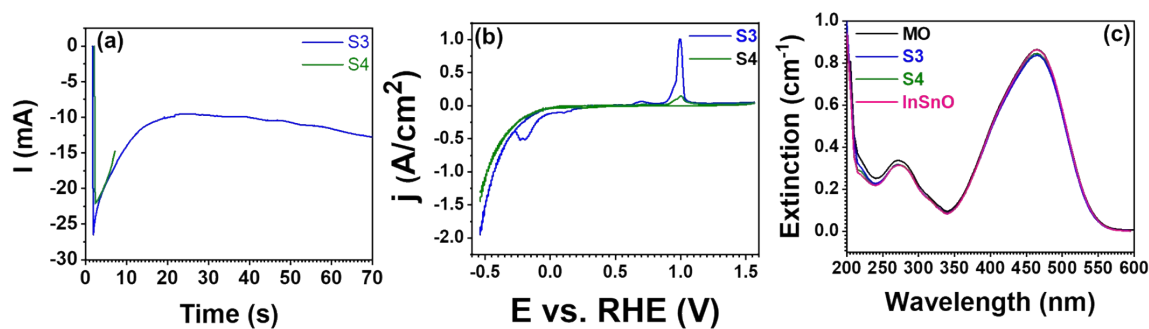

**Figure S12.** (a) chronoamperometry graph showing electrodeposition of copper nanoparticles for sample S4 and S5 on ITO (b) Cyclic voltammetry of the as-deposited Cu nanoparticles (S4 & S5) recorded in 1 M NaOH, (c) Photocatalytic degradation of methyl orange under visible light conditions monitored by UV-vis spectrometry of samples S4, S5 and InSnO (ITO).

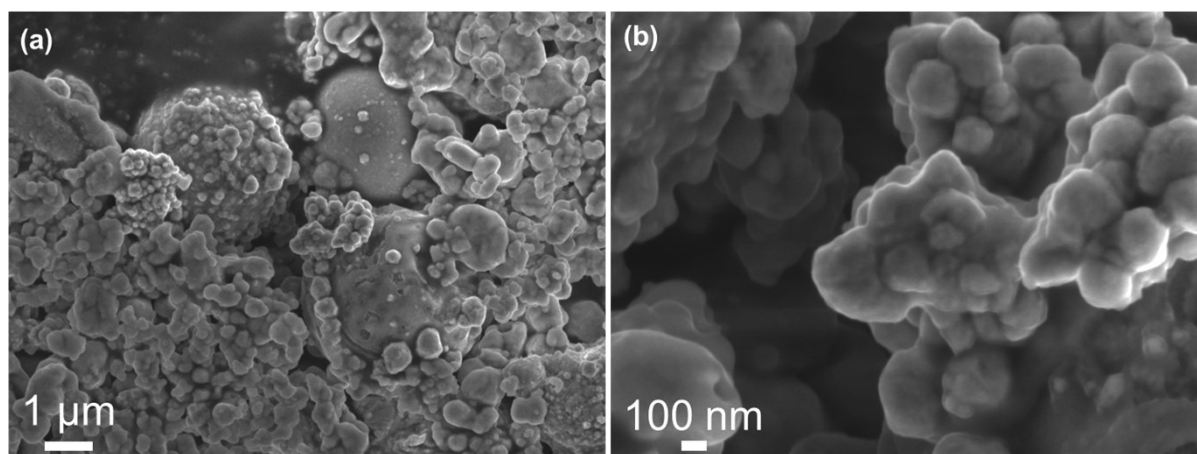

**Figure S13.** SEM images of sample S3.

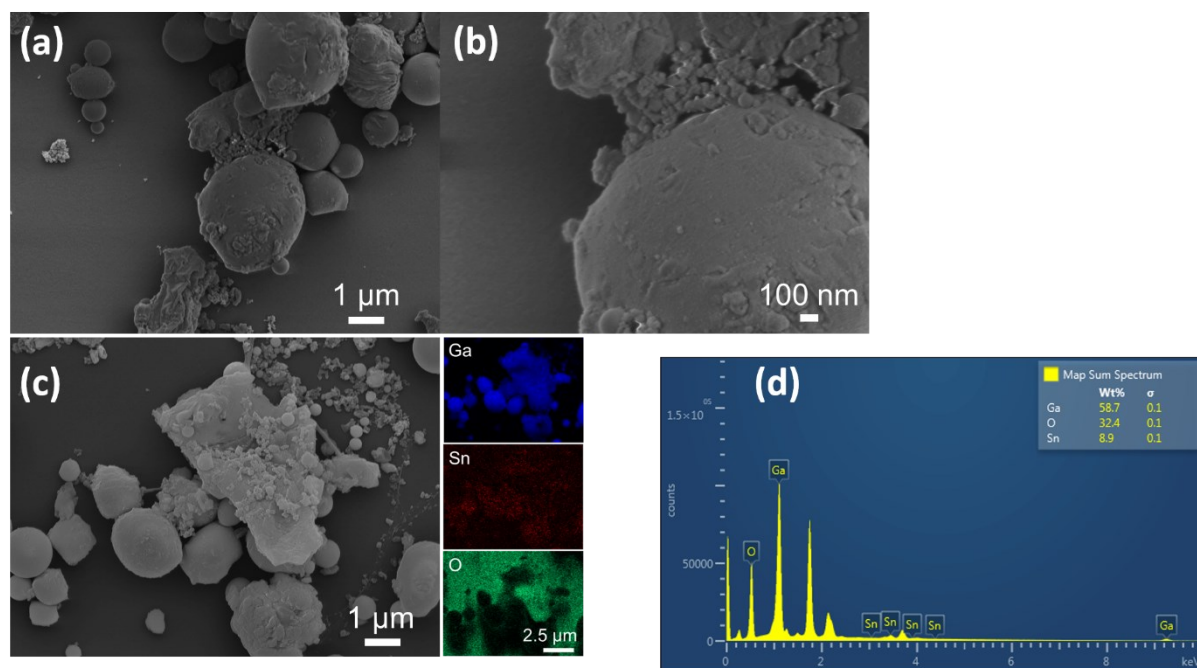

**Figure S14.** Liquid GaSn (10 wt % Sn) after sonication in acidic conditions (a-b) SEM images, (c) EDX mapping and (d) EDX spectrum.

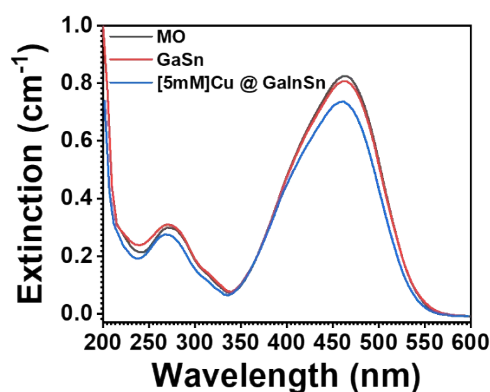

**Figure S15.** Photocatalytic degradation of methyl orange under solar simulated conditions monitored by UV-vis spectrometry of GaSn system (Figure S14) and GaInSn sonicated in acidified 5 mM CuSO<sub>4</sub> (Figure S9).

**Table S1.** Summary of synthesis conditions

| Sample ID | Synthesis Method             | Starting materials                                                    | Added materials           |
|-----------|------------------------------|-----------------------------------------------------------------------|---------------------------|
| S1        | Sonication/Galvanic reaction | Acidified water + GaInSn                                              | CuSO <sub>4</sub> [0.2 M] |
| S2        | Sonication/Galvanic reaction | Acidified water + GaInSn                                              | -                         |
| S3        | Sonication/Galvanic reaction | Acidified water + Gallium                                             | CuSO <sub>4</sub> [0.2M]  |
| S4, S5    | Electrodeposition            | CuSO <sub>4</sub> .5H <sub>2</sub> O + H <sub>2</sub> SO <sub>4</sub> | -                         |

Samples S4 and S5 are electrodeposited Cu nanomaterials on ITO electrodes from 50 mM CuSO<sub>4</sub> in acidic medium, S4 was electrodeposited on InSnO (ITO) for a duration of 70s at -1.0V vs. Ag/AgCl while S5 was deposited for only 10 s at the same experimental condition.

**Table S2.** Brisbane, Australia weather report for June 24, 2019, at exact time the investigation was carried out<sup>[1]</sup>

| Time (AEST) | Temperature (°C) | Dew Point (°C) |
|-------------|------------------|----------------|
|-------------|------------------|----------------|

---

|       |      |     |
|-------|------|-----|
| 9:00  | 15.0 | 7.3 |
| 10:00 | 16.6 | 6.7 |
| 11:00 | 18.1 | 7.2 |
| 12:00 | 18.5 | 6.7 |
| 13:00 | 19.7 | 6.8 |
| 14:00 | 20.3 | 7.7 |
| 15:00 | 18.7 | 7.8 |
| 16:00 | 17.8 | 8.4 |

---

[1] Observations for Brisbane, <http://www.bom.gov.au/>, accessed: June 24, 2019.
